# Supplementary material for: Temporal Roles of Platelet and Coagulation Pathways in Collagen- and Tissue Factor-Induced Thrombus Formation
Source: MDPI journal article supplement (doi:10.3390/ijms23010358), 2021-12-29
Supplement: s1 [file s1]

# Temporal roles of platelet and coagulation pathways in collagen and tissue factor induced thrombus formation

Stefano Navarro <sup>1,2</sup>, David Stegner <sup>1</sup>, Bernhard Nieswandt <sup>1</sup>, Johan W.M. Heemskerk <sup>2,3</sup> and Marijke J. E. Kuijpers <sup>2,4,\*</sup>

<sup>1</sup> Department of Vascular Biology, Rudolf Virchow Center for Experimental Biomedicine, Würzburg Josef-Schneider-Straße 2, 97080 Würzburg, Germany.

<sup>2</sup> Department of Biochemistry, Cardiovascular Research Institute Maastricht (CARIM), Maastricht University, 6229 ER Maastricht, The Netherlands

<sup>3</sup> Synapse Research Institute, Kon. Emmalein 7, 6214 AC Maastricht, The Netherlands. E-mail: jwmheem722@outlook.com

<sup>4</sup> Thrombosis Expertise Center, Heart and Vascular Center, Maastricht University Medical Center+, Maastricht, Professor Debyelaan 25, 6229HX Maastricht, The Netherlands. Tel. +31-43-3881674. E-mail: marijke.kuijpers@maastrichtuniversity.nl

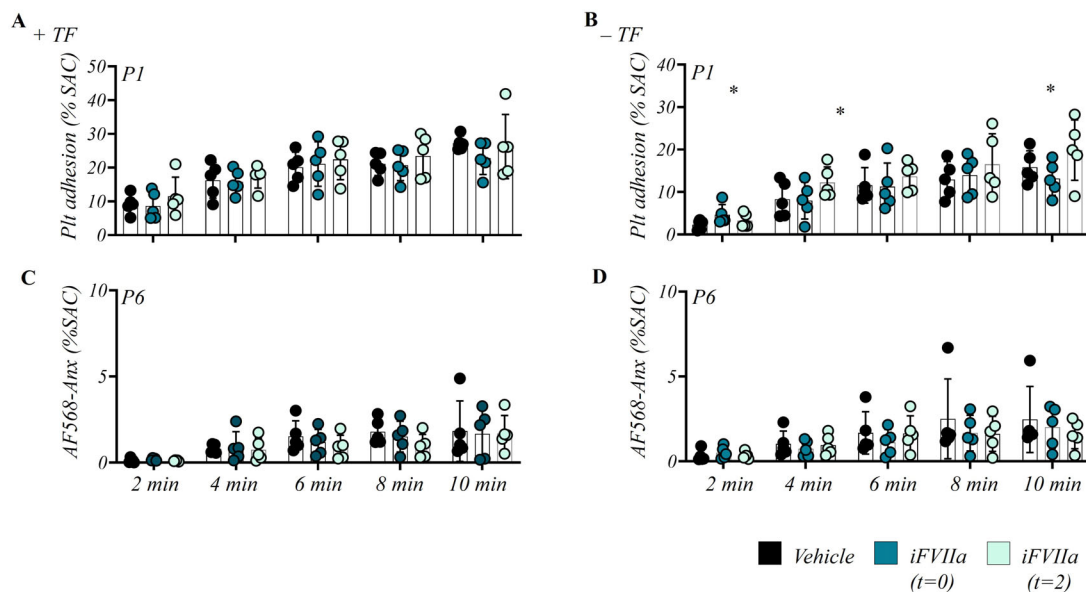

**Figure S1.** Priming role of TF in progression of platelet-fibrin thrombus formation on collagen under high shear. Citrated whole blood from healthy subjects ( $n = 5$ ) was supplemented with fluorescent labels to simultaneously detect platelet adhesion (P1, DiOC<sub>6</sub>), thrombus and platelet multilayer characteristics (P2-5, brightfield), phosphatidylserine exposure (P6, AF568-annexin A5) and fibrin deposition (P7, AF647-fibrin). Where indicated, perfusion was from start ( $t=0$ ) with iFVIIa-treated blood (1  $\mu$ M, f.c.), or the control blood was switched after 2 min with iFVIIa-treated blood ( $t=2$ ). Control blood runs were carried out with vehicle solution. During blood flow, monochromatic images in 4 colors were captured from collagen/TF and collagen microspots by microscopy at 2, 4, 6, 8 and 10 min. Shown are quantitative effects of iFVIIa on thrombus parameters: (A, B) platelet adhesion (P1); and (C, D) AF568-annexin A5 staining for phosphatidylserine exposure (P6). Means  $\pm$  SD, \* $p < 0.05$ , \*\* $p < 0.01$ , \*\*\* $p < 0.001$  vs. indicated group (t-test). See further Figure 1.

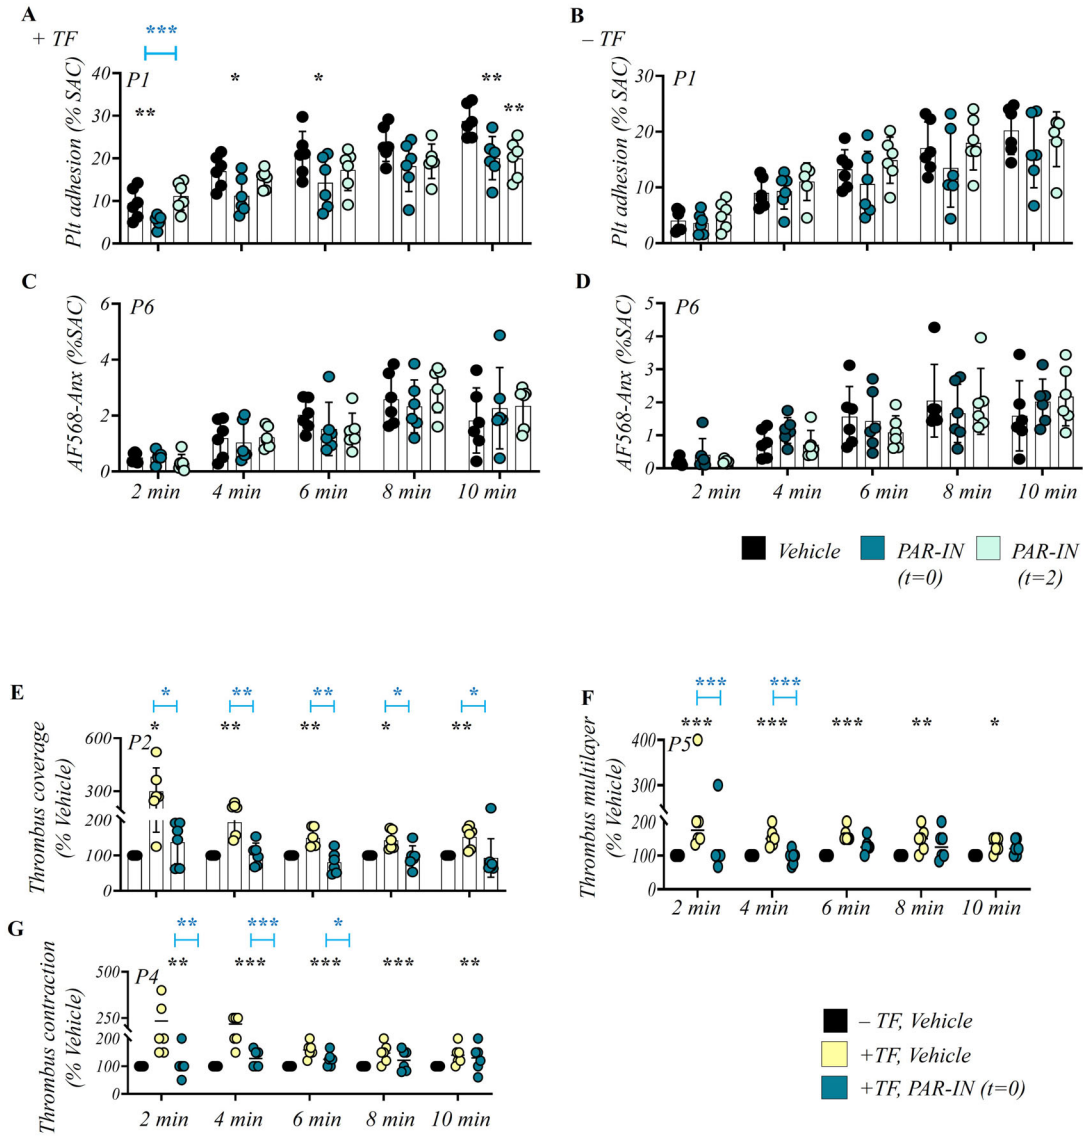

**Figure S2.** Temporal roles of platelet thrombin receptors PAR1 and PAR4 in platelet-fibrin thrombus formation on collagen with TF. Citrated whole blood samples from healthy subjects ( $n = 6$ ) were supplemented with fluorescent labels, and perfused over microspots of collagen and collagen/TF, as described for Figure 1. Where indicated (PAR-IN), perfusion was switched from control blood to blood preincubated with vehicle or a mix of atopaxar (PAR1 inhibitor, 2  $\mu$ M, f.c.) and BMS-986120 (PAR4 inhibitor, 1  $\mu$ M, f.c.). Shown are quantitative effects of PAR-IN on thrombus parameters: (A, B) platelet adhesion (P1); and (C, D) AF568-annexin A5 staining for phosphatidylserine exposure (P6). Furthermore, normalized (*vs.* -TF vehicle) quantification per donor of effects of +TF vehicle and PAR-IN on: (E) thrombus coverage (P2); (F) thrombus multilayering (P5); and (G) thrombus contraction (P4). Means  $\pm$  SD, \* $p < 0.05$ , \*\* $p < 0.01$ , \*\*\* $p < 0.001$ . *vs.* indicated group (t-test). See further Figure 2.

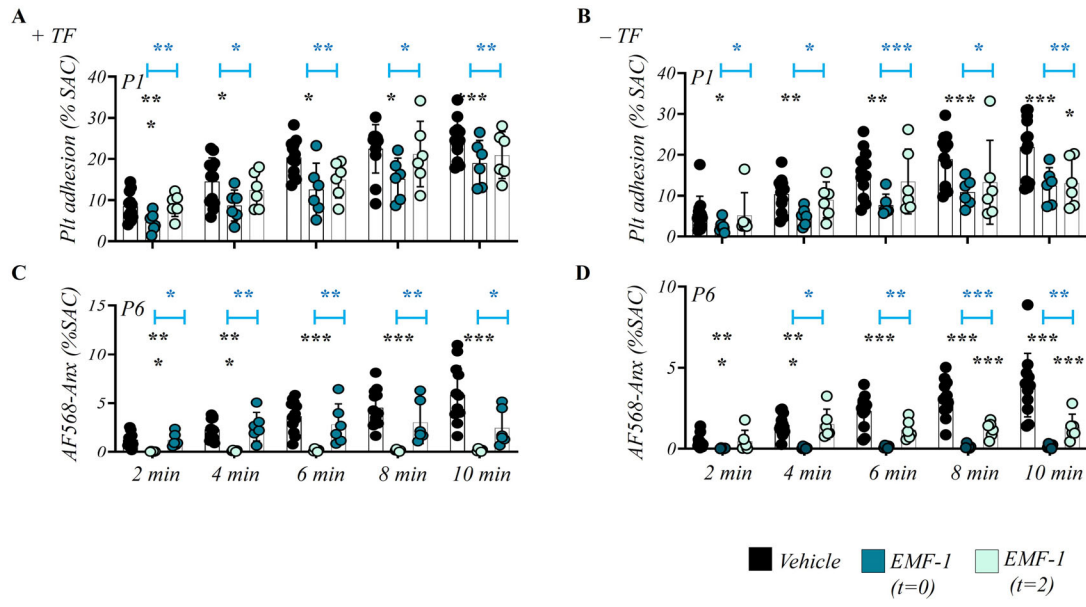

**Figure S3.** Time-dependent role of GPVI receptor in platelet-fibrin thrombus formation on collagen. Citrated whole blood was labeled and co-perfused with recalcification medium over collagen and collagen/TF microspots ( $n = 6$ ), as for Figure 1. Where indicated, perfusion was switched at 2 min from control blood to blood preincubated with vehicle or anti-GPVI Fab EMF-1 (10  $\mu\text{g/mL}$ , f.c.). Shown are quantitative effects of EMF-1 Fab on thrombus parameters: (**A**, **B**) platelet adhesion (P1); and (**C**, **D**) AF568-annexin A5 staining for phosphatidylserine exposure (P6). Means  $\pm$  SD, \* $p < 0.05$ , \*\* $p < 0.01$ , \*\*\* $p < 0.001$  vs. indicated group (t-test). See further Figure 3.

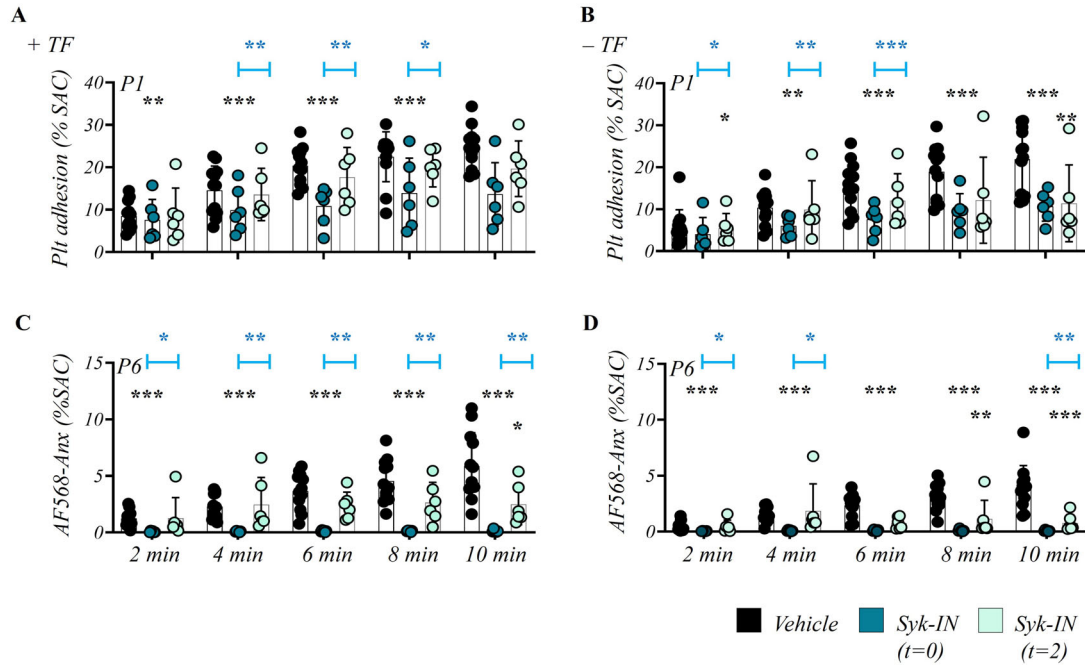

**Figure S4.** Temporal role of platelet Syk activation in platelet-fibrin thrombus formation independently of TF. Citrated whole blood was labeled and co-perfused with recalcification medium over collagen and collagen/TF microspots ( $n = 6$ ), as for Figure 1. Where indicated, perfusion was switched at 2 min from control blood to blood preincubated with vehicle or Syk-IN (PRT-060318, 20  $\mu$ M). Shown are quantitative effects of Syk-IN on thrombus parameters: (A, B) platelet adhesion (P1); and (C, D) AF568-annexin A5 staining for phosphatidylserine exposure (P6). Means  $\pm$  SD, \* $p < 0.05$ , \*\* $p < 0.01$ , \*\*\* $p < 0.001$  vs. indicated group (t-test). See further Figure 4.

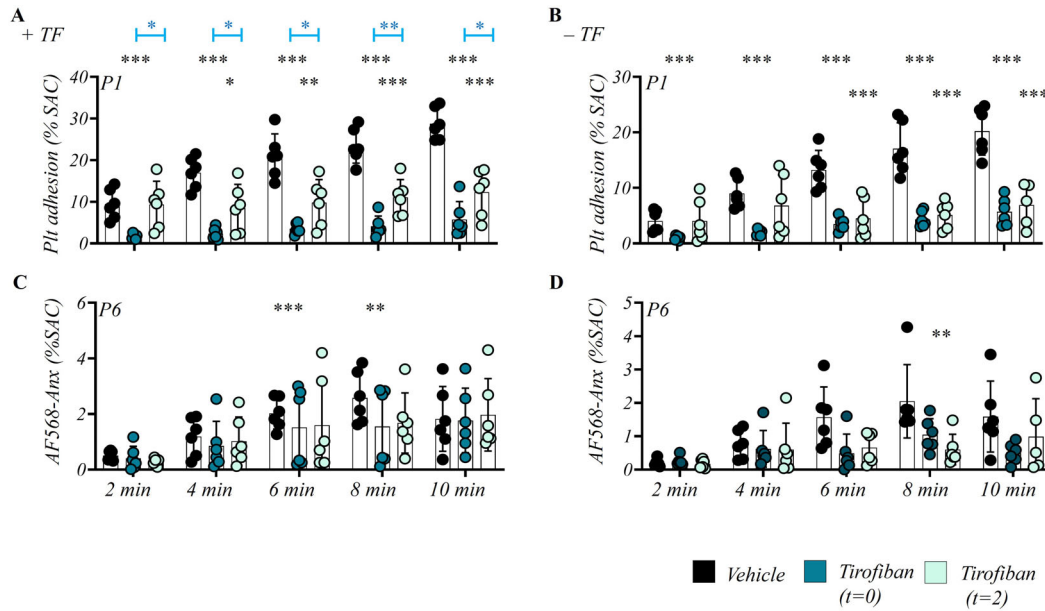

**Figure S5.** Persistent role of integrin  $\alpha$ IIb $\beta$ 3 in platelet-fibrin thrombus formation independently of tissue factor. Citrated whole blood was labeled and co-perfused with recalcification medium over collagen and collagen/TF microspots ( $n = 6$ ), as for Figure 1. Where indicated, perfusion was switched from control blood to blood preincubated with vehicle or integrin  $\alpha$ IIb $\beta$ 3 inhibitor (tirofiban, 1  $\mu$ g/mL). Shown are quantitative effects of tirofiban on thrombus parameters: (**A**, **B**) platelet adhesion (P1); and (**C**, **D**) AF568-annexin A5 staining for phosphatidylserine exposure (P6). Means  $\pm$  SD, \* $p < 0.05$ , \*\* $p < 0.01$ , \*\*\* $p < 0.001$  vs. indicated group (t-test). See further Figure 5.

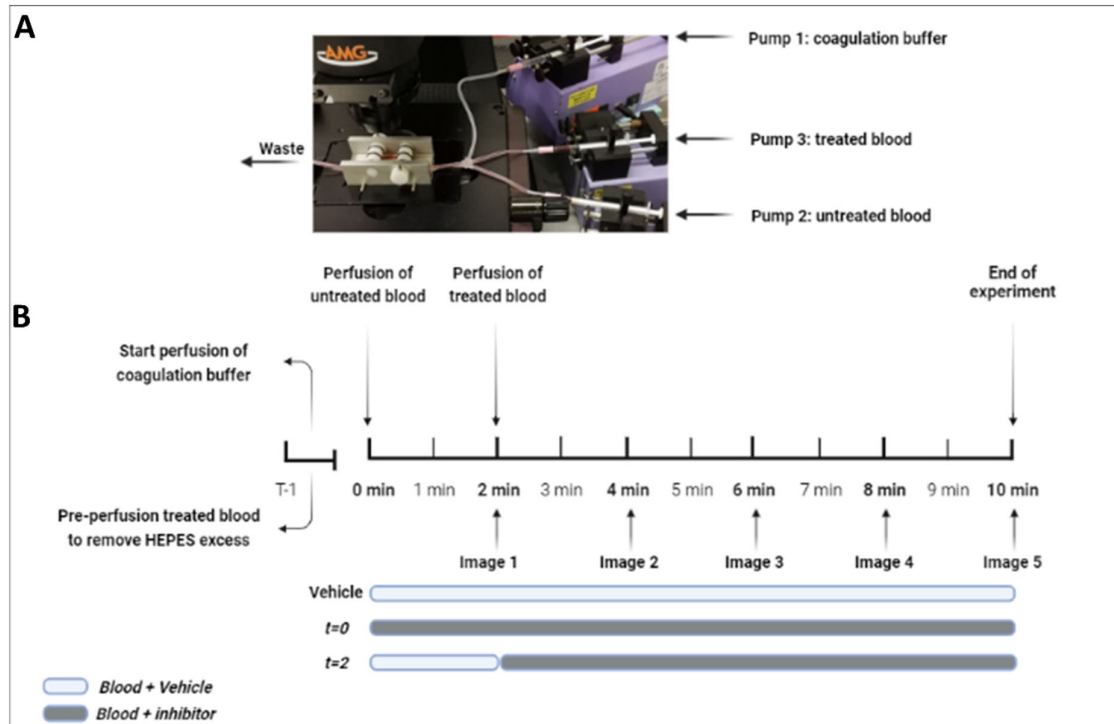

**Figure S6.** Setup and flowchart of three-way tubing inlet system to for immediate switching from vehicle control blood to inhibited blood. **(A)** Picture of three connected tubes, allowing pressure infusion of recalcification medium into respective blood samples. The syringe attached to pump 1 contains recalcification medium with 32 mM  $\text{MgCl}_2$  and 63 mM  $\text{CaCl}_2$  in Hepes buffer pH 7.45, the syringe attached to pump 2 contains blood labeled with DiOC<sub>6</sub>, AF568-annexin A5 and AF647-fibrinogen and vehicle, and the syringe attached to pump 3 contains blood with the same labels plus required inhibitor. **(B)** Flowchart showing the sequence of actions during an experiment. Pump 1 operated constantly at 1x flow rate. Before start of the experiment, pump 3 was run at 9x flow rate to allow removal of Hepes buffer pH 7.45 from the connection tube. The pump 3 was stopped once the blood reached the connection point. Pump 2 was run at 9x flow rate from start during the first 75 s, after which pump 3 took over. Of note, the time required for blood from the connection point to the inlet of the flow chamber was timed at 45 s (final calculated wall-shear rate of  $1000 \text{ s}^{-1}$ ). This timing thus allowed perfusion for the first 2 min of untreated blood and consecutively of treated blood for the next 8 min.
